# Supplementary material for: Proteomics Analysis of Serum Proteins in Gestational Diabetes
Source: Hindawi journal article supplement (doi:10.1155/2021/4724590), 2021-11-02
Supplement: f1 [file 4724590.f1.zip]

Archive with 2 entries (2 files):
- 4724590.f1/Figure S1.pdf
- 4724590.f1/Figure S2.pdf
