# Supplementary figures and images for: Proteomics Analysis of Serum Proteins in Gestational Diabetes
Source: Hindawi journal article supplement (doi:10.1155/2021/4724590), 2021-11-02

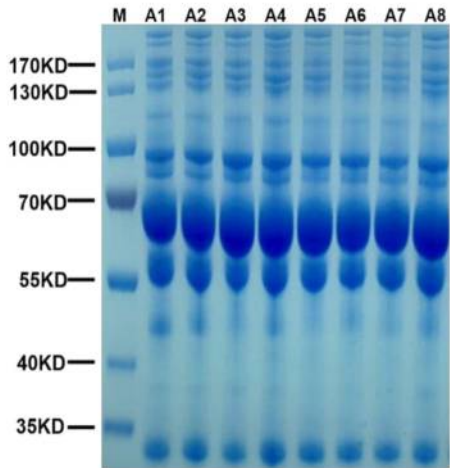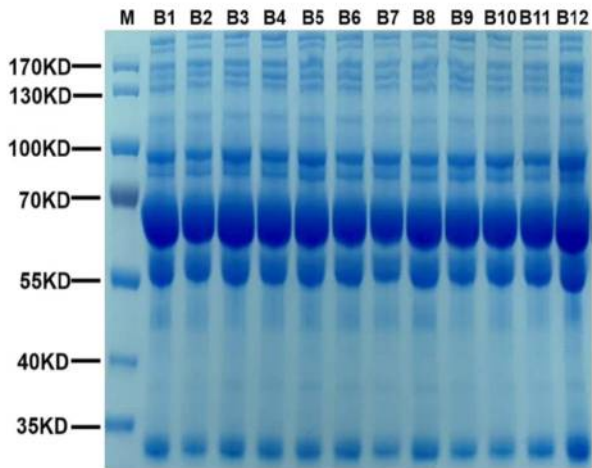

Supplement: f1 [file 4724590.f1.zip]

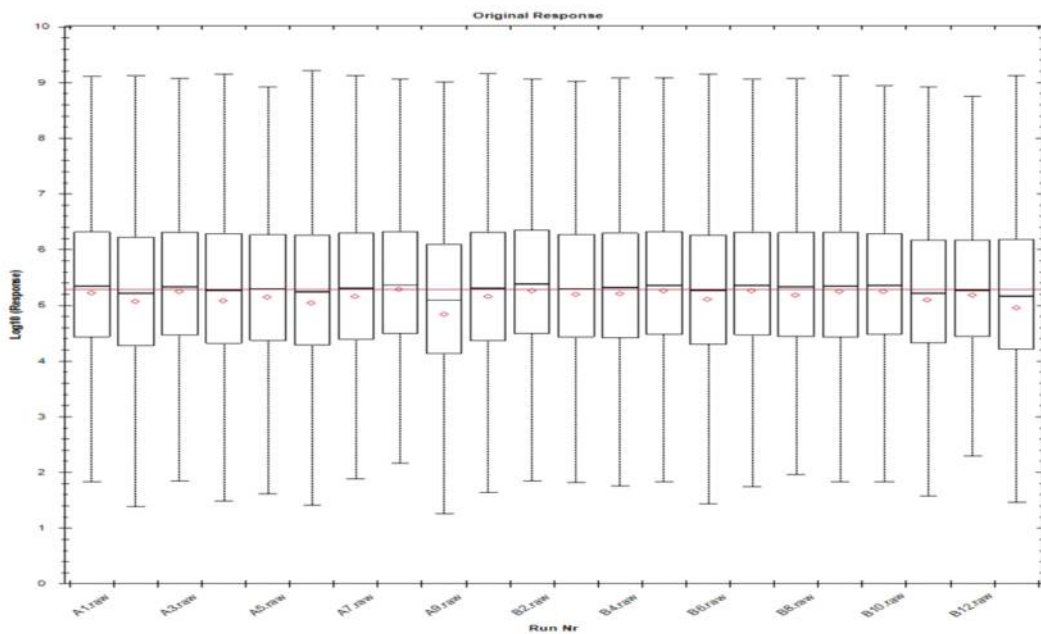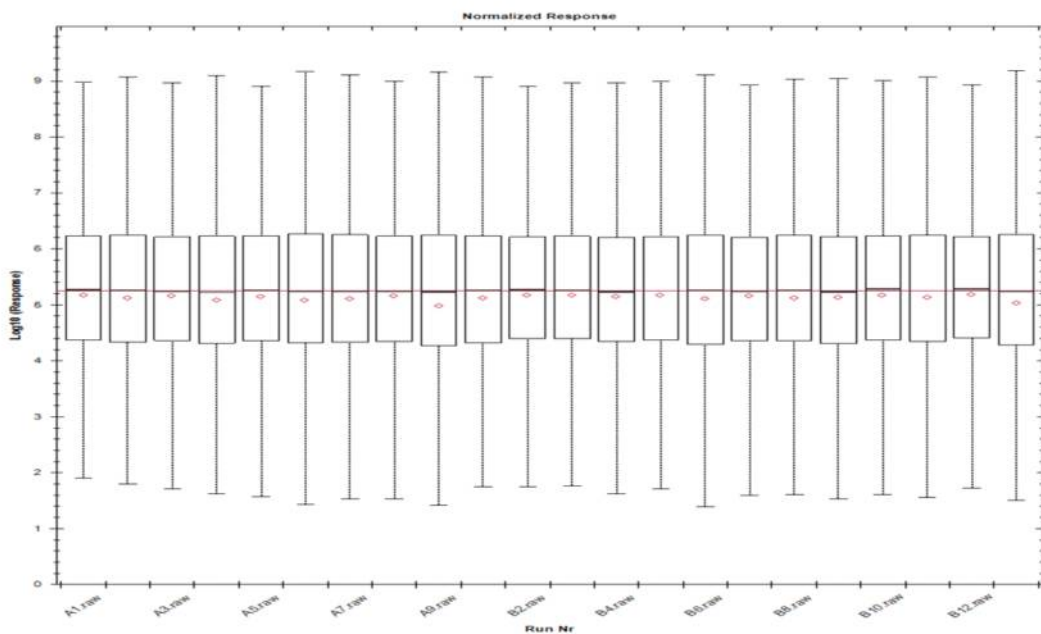

Supplement: f1 [file 4724590.f1.zip]
